# Supplementary material for: Randomised trials of proton pump inhibitors for gastro-oesophageal reflux disease in patients with asthma: an updated systematic review and meta-analysis
Source: PubMed Central journal article supplement — BMJ Open. 2021 Aug 10;11(8):e043860. doi: 10.1136/bmjopen-2020-043860 (PMC8356177; doi:10.1136/bmjopen-2020-043860), 2021-08-10
Supplement: bmjopen-2020-043860supp001.pdf [file bmjopen-2020-043860supp001.pdf]

**Supplement Table 1** Summary of the characteristics of included studies

| Trials         | Location                                                         | Study design | Medication/dose and usage | Concurrent treatment                                                   | Duration (weeks) | Number of Randomized/Completed patients |               | Inclusion criteria                                                                                                                                                                                                                                                                     |                                                                                                                                                                                    | Concurrent disease | Major exclusions                                                                                                                                       |
|----------------|------------------------------------------------------------------|--------------|---------------------------|------------------------------------------------------------------------|------------------|-----------------------------------------|---------------|----------------------------------------------------------------------------------------------------------------------------------------------------------------------------------------------------------------------------------------------------------------------------------------|------------------------------------------------------------------------------------------------------------------------------------------------------------------------------------|--------------------|--------------------------------------------------------------------------------------------------------------------------------------------------------|
|                |                                                                  |              |                           |                                                                        |                  | Intervention group                      | Control group | Asthma diagnosis                                                                                                                                                                                                                                                                       | GERD Diagnosis                                                                                                                                                                     |                    |                                                                                                                                                        |
| Ford 1994      | UK                                                               | Crossover    | Omeprazole 20 mg, qd      | ICS 80%, ipratropium 10%                                               | 4                | Total: 11/10                            |               | Doctor's diagnosis; reversibility PEFR after bronchodilator use: $\geq 15\%$ ; nocturnal asthma attack                                                                                                                                                                                 | Abnormal pH in 24-h pH monitoring; upper gastrointestinal endoscopy; history of esophagitis                                                                                        | Not stated         | Not specified                                                                                                                                          |
| Meier 1994     | America                                                          | Crossover    | Omeprazole 20 mg, bid     | Asthma medications (lack of type), theophylline 11/15                  | 6                | Total: 15/15                            |               | ATS; reversibility of FEV <sub>1</sub> and/ or PEF after bronchodilator use: $>15\%$                                                                                                                                                                                                   | Abnormal pH in 24-h pH monitoring; manometry; esophagogastroduodenoscopy; acid-perfusion (Bernstein) test                                                                          | Not stated         | $\leq 18$ years old; pregnancy, female unwilling to use birth contraception; unable to give informed consent                                           |
| Teichtahl 1996 | Australia                                                        | Crossover    | Omeprazole 40 mg, qd      | Other asthma medications; $\beta 2A$                                   | 4                | Total: 25/20                            |               | Doctor's diagnosis; positive HIT; diurnal variation of PEFR $\geq 20\%$ ; reversibility of FEV <sub>1</sub> and/ or PEF after bronchodilator use: $>15\%$                                                                                                                              | Abnormal pH in 24-h pH monitoring; endoscopy                                                                                                                                       | Not stated         | Other significant respiratory disease; respiratory tract infection; significant systemic, esophageal stricture                                         |
| Boeree 1998    | The Netherlands                                                  | Parallel     | Omeprazole 40 mg, bid     | ICS 0.4 mg/day used in all                                             | 12               | 18/16                                   | 18/14         | Doctor's diagnosis; FEV <sub>1</sub> $>1.25$ L, PC20 $<2$ mg/mL                                                                                                                                                                                                                        | Abnormal pH in 24-h pH monitoring, increased GER was defined as $>4\%$ of 24 h registration, or $>3\%$ during the supine position                                                  | COPD               | Upper and/or lower respiratory tract infection, other concomitant lung diseases                                                                        |
| Levin 1998     | America                                                          | Crossover    | Omeprazole 20 mg, qd      | Inhaled $\beta$ -agonists used in all                                  | 8                | total: 11/9                             |               | Doctor's diagnosis; $\geq 15\%$ reversibility in FEV <sub>1</sub> after bronchodilator treatment; asthma medication used daily                                                                                                                                                         | Symptoms of heartburn or regurgitation at least once weekly without therapy; manometry, ambulatory 24-h esophageal pH monitoring                                                   | Not stated         | COPD, URTI, prior gastroesophageal surgery, acute PUD, use of omeprazole or URTI within previous 30 days                                               |
| Kiljander 1999 | Finland                                                          | Crossover    | Omeprazole 40 mg, qd      | $\beta 2A$ 91%; ICS 89%                                                | 8                | total: 57/52                            |               | Doctor's diagnosis; ATS                                                                                                                                                                                                                                                                | 24-h pH monitoring and manometry                                                                                                                                                   | Not stated         | Not specified                                                                                                                                          |
| Littner 2005   | multi-center, North America                                      | Parallel     | Lansoprazole 30 mg, bid   | ICS, stable doses of asthma medications for at least 4 wks             | 24               | 99/85                                   | 108/88        | Doctor's diagnosis; FEV <sub>1</sub> pred $> 50\%$ and $< 85\%$ ; $\geq 12\%$ improvement in FEV <sub>1</sub> (in liters) after the inhalation of 180 ug of albuterol; five or more nocturnal asthma awakenings and receiving stable doses of asthma medications within previous 4 wks | Investigator judgement based on symptomatic acid reflux and acid-suppressive therapy; 24-h esophageal pH monitoring                                                                | Not stated         | Smoking; receiving ipratropium bromide, immunotherapy; URTI; uncontrolled medical condition; receiving PPI within 14 days                              |
| Størdal 2005   | Norway                                                           | Parallel     | Omeprazole 20 mg, qd      | ICS: Int n=17, Cont n=17; long acting bronchodilators: Int 10, Cont 12 | 12               | 19/18                                   | 19/18         | Doctor's diagnosis; at least two episodes of asthma symptoms requiring medication within previous six months                                                                                                                                                                           | 24-h pH monitoring; A reflux index $\geq 5.0$ was considered abnormal                                                                                                              | Not stated         | Previously known or treated GERD                                                                                                                       |
| Kiljander 2006 | GERD+/NOC+ (Kiljander-1)<br>Europe, North America, South America | Parallel     | Esomeprazole 40 mg, qd    | ICS: 98.6%; LABAs: 49.8%                                               | 16               | 112/105                                 | 107/105       | FEV <sub>1</sub> % pred: 50 to 80%, $\geq 12\%$ (and $\geq 0.20$ L) reversibility; PEF pred $< 80\%$ ; symptom of nighttime awakening with related respiratory symptoms; or PEF                                                                                                        | Heartburn $\geq 2$ times/wk; acid regurgitation $\geq$ once /wk within previous 3 month. erosive esophagitis or Barrett's esophagus (without dysplasia) documented in the previous | Not stated         | Smoking; esophageal or gastric surgery; glucocorticosteroids $< 30$ days; erosive esophagitis $\leq 16$ wks and PPI use $< 14$ days before enrollment; |
|                |                                                                  | Parallel     | Esomeprazole 40 mg, bid   | ICS: 97.7%; LABAs: 34%                                                 | 16               | 174/174                                 | 176/171       |                                                                                                                                                                                                                                                                                        |                                                                                                                                                                                    |                    |                                                                                                                                                        |

| (Kiljander-2)    |                                                   |           |                                                                        |                                                                                           |    |                                         |         | overnight variability $\geq 15\%$                                                                                                                                                                                                      | 12 months; abnormal 24-h esophageal pH                                                                                        | recurrent moderate or severe GERD symptoms |                                                                                                                          |
|------------------|---------------------------------------------------|-----------|------------------------------------------------------------------------|-------------------------------------------------------------------------------------------|----|-----------------------------------------|---------|----------------------------------------------------------------------------------------------------------------------------------------------------------------------------------------------------------------------------------------|-------------------------------------------------------------------------------------------------------------------------------|--------------------------------------------|--------------------------------------------------------------------------------------------------------------------------|
| dos Santos-2007  | Brazil                                            | Parallel  | Pantoprazole 40 mg, qd                                                 | long-acting $\beta_2$ -agonists (%): Int 45%, Cont 64%; oral corticoids: Int 9%, Cont 18% | 12 | total: 44 (Int n=22, Cont n=22)/35      |         | Asthmatic clinical history and symptoms for at least two months; airflow obstruction ( $FEV_1/FVC$ ) < 90% of predicted; the methacholine bronchoprovocation test (+), obstruction reversibility: $FEV_1 > 200$ mL and 7% of predicted | 24-h esophageal pH monitoring; manometry                                                                                      | Not stated                                 | Smoking; receiving PPI and H-2 receptor blocker; systemic arterial hypertension                                          |
| Susanto-2008     | Indonesia                                         | Crossover | Esomeprazole 40 mg, qd                                                 | inhaled budesonide 400 $\mu$ g bid, salbutamol 100 mg/puff                                | 8  | 18/16                                   | 18/16   | GINA 2002                                                                                                                                                                                                                              | Endoscopy and or esophageal histopathologic examination; typical GERD symptoms                                                | Not stated                                 | Not specified                                                                                                            |
| Mastronarde-2009 | Multicenter, North America                        | Parallel  | Esomeprazole 40 mg, bid                                                | ICS in all                                                                                | 24 | 61 /61                                  | 62 /62  | Doctor's diagnosis; positive methacholine challenge test; 12% increase in $FEV_1$ after bronchodilator treatment                                                                                                                       | 24-h pH monitoring, mean % time with pH < 4 (range): total >5.8%, upright >8.2%, supine <3.5%                                 | Not stated                                 | Smoking; $FEV_1\%$ pred <50%; surgery; acid-suppression treatment                                                        |
| Kiljander-2010   | Multicenter, Europe, North America, South America | Parallel  | Esomeprazole 40 mg, qd/bid                                             | ICS and LABA in all                                                                       | 26 | 40 mg, qd: 313/273; 40 mg, bid: 320/272 | 328/283 | Doctor's diagnosis; ATS                                                                                                                                                                                                                | The validated Reflux Disease Questionnaire, esophageal 24-h pH monitoring                                                     | Not stated                                 | Alarm symptoms presented, smoking, esophageal or gastric surgery, Barrett esophagus                                      |
| Holbrook 2012    | America                                           | Parallel  | Lansoprazole, children <30 kg: 15 mg/d; children $\geq 30$ kg: 30 mg/d | ICS in all                                                                                | 24 | 29 /29                                  | 20 /20  | Doctor's diagnosis; $\geq 12\%$ in $FEV_1$ after bronchodilator treatment; $PC20 \leq 16$ mg/mL; positive exercise bronchoprovocation test                                                                                             | Ambulatory esophageal pH monitoring: time of pH <4 in 6- to 11-year-old for $\leq 6\%$ , in 12- to 17-year-old for $\leq 4\%$ | Not stated                                 | Receiving PPI or other reflux medications; anti-reflux surgery or trachea-esophageal fistula repair; $FEV_1\%$ pred <60% |

Abbreviations: LABA, long-acting  $\beta_2$ -agonists,  $FEV_1$ , forced expiratory volume in 1 second; FVC, forced vital capacity;  $PC20$ , provocative concentration of methacholine bromide causing a  $\geq 20\%$  fall in forced expiratory volume in 1 second;  $\beta_2A$ , inhaled  $\beta_2$ -agonists, ICS, inhaled corticosteroid; mPEF, morning peak expiratory flow; PEF, morning peak expiratory flow; pred, predicted; PUD, peptic ulcer disease; URTI, upper respiratory tract infection; GER, gastroesophageal reflux; GERD, gastroesophageal reflux disease; GINA: Global Initiative for Asthma; ATS: American Thoracic Society; Int, intervention; Cont, control; wks, weeks; qd, once daily; bid, twice daily; PPI, proton pump inhibitor, NOC, nocturnal respiratory symptoms; SD, standard deviation; HIT histamine bronchoprovocation test; NA, not available
